# Supplementary material for: Transforming Commercial Copper Sulfide into Injectable Hydrogels for Local Photothermal Therapy
Source: MDPI journal article supplement (doi:10.3390/gels8050319), 2022-05-19
Supplement: s1 [file s1]

Supplementary Materials

# Transforming Commercial Copper Sulfide into Injectable Hydrogels for Local Photothermal Therapy

Xiaoran Wang <sup>1,†</sup>, Zizhen Yang <sup>1,†</sup>, Zhaowei Meng <sup>1,\*</sup> and Shao-Kai Sun <sup>2,\*</sup>

**Table S1.** The stability of different concentrations of CSH.

| Concentration (mg CuS/mL) | 15  | 30  | 60  | 90  | 120 | 240 | 480 |
|---------------------------|-----|-----|-----|-----|-----|-----|-----|
| settling time (days)      | >14 | >14 | >14 | >14 | 12  | 9   | 5   |

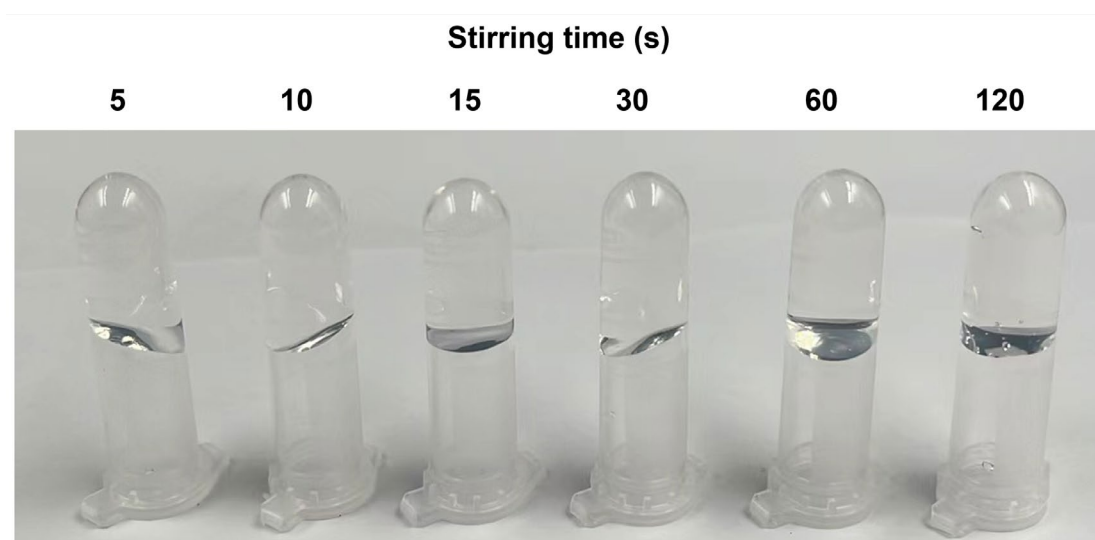

**Figure S1.** Photos of ACH stirred for different times after mixing alginate solution and Ca<sup>2+</sup> solution.

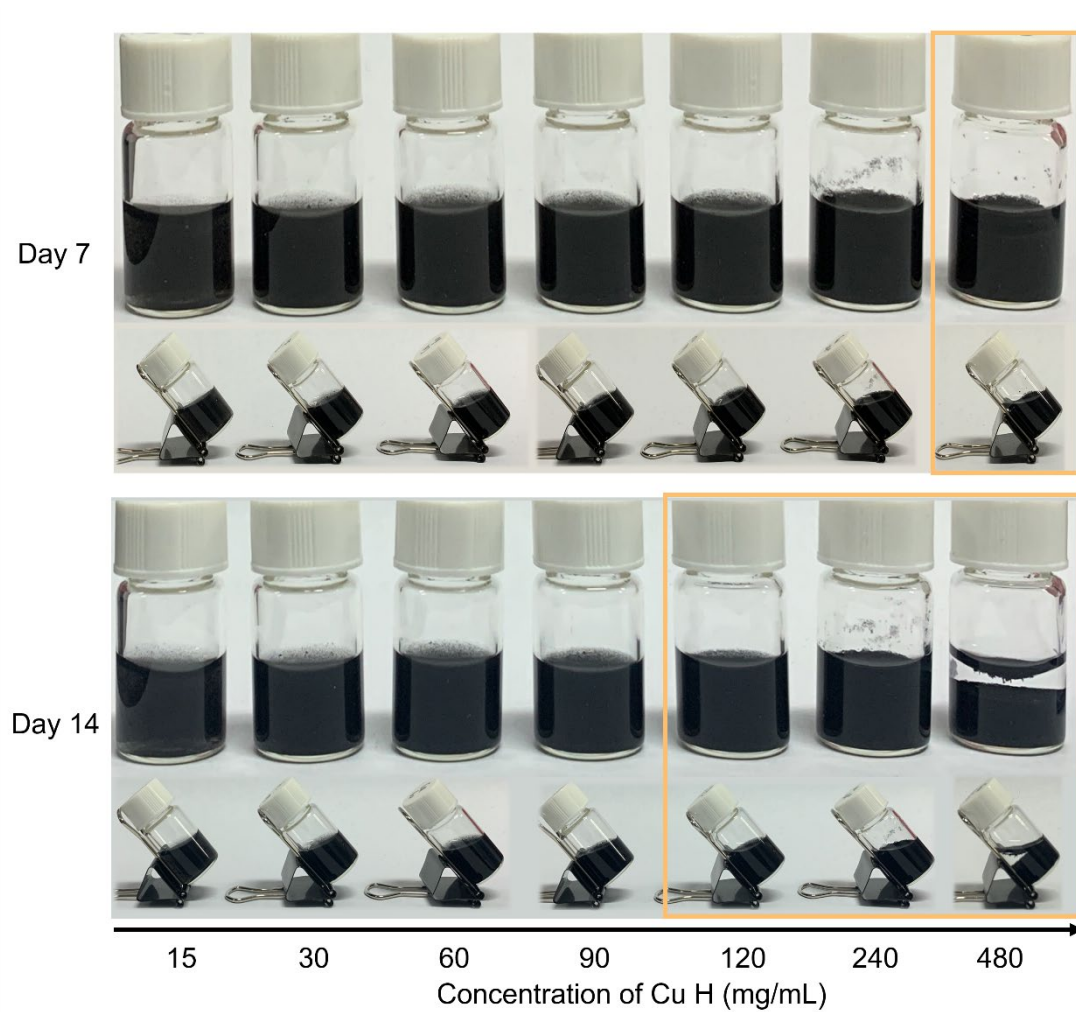

**Figure S2.** Standing and oblique photos of different concentrations of CSH taken on day 7 and day 14.

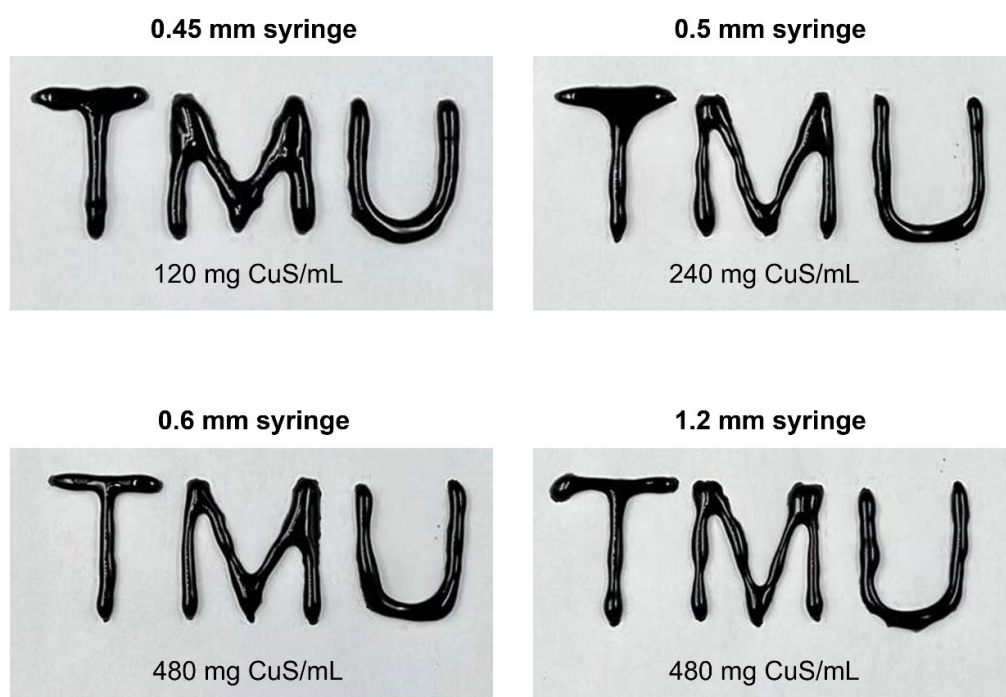

**Figure S3.** The maximum injectable concentration of CSH through various size of syringes, and "TMU" written by them.

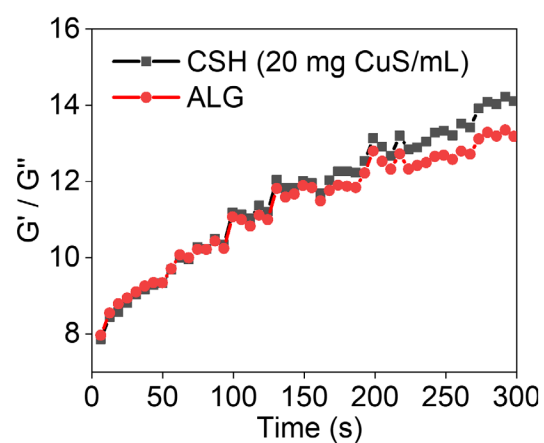

**Figure S4.** Rheological properties of ACH and CSH (20 mg CuS/mL).  $G'$ : storage modulus,  $G''$ : loss modulus.

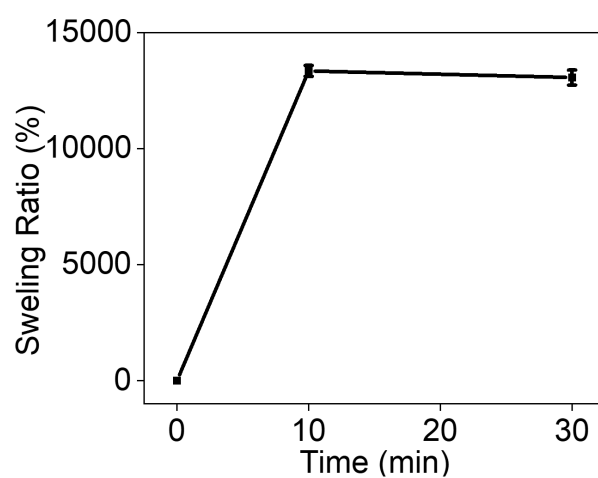

**Figure S5.** (A) Curve of swelling ratio of ACH in PBS (pH=7.4).

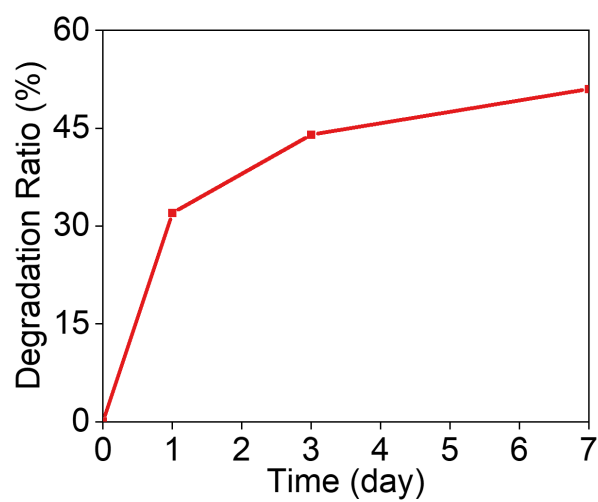

**Figure S6.** Degradation curve of ACH in PBS (pH=7.4).

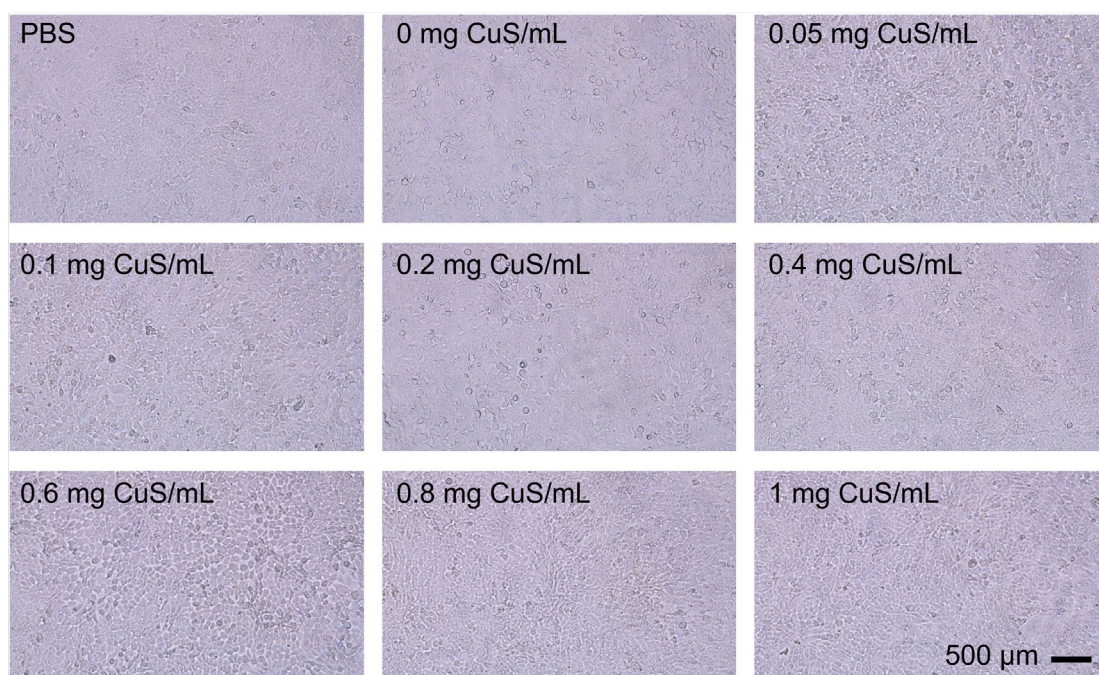

**Figure S7.** Photos of 4T1 cells incubated with different concentrations of CSH or PBS for 24 h.

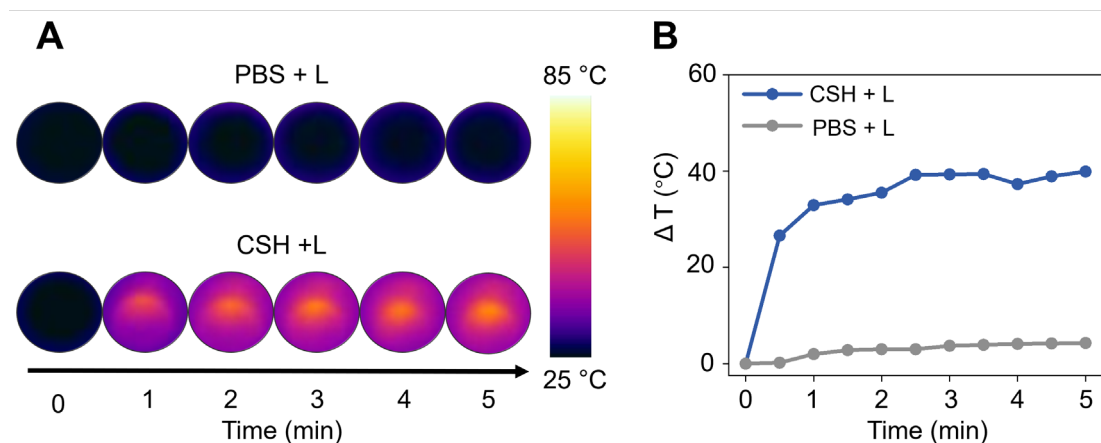

**Figure S8.** Thermal images (A) and photothermal heating curves (B) of CSH (20 mg CuS/mL) and PBS under 1064 nm laser irradiation in vitro.
